# Supplementary material
Source: PubMed Central journal article supplement (PMC7484893)
Supplement: Supp_FigS1.pdf [file Supp_FigS1.pdf]

## Supplementary Data

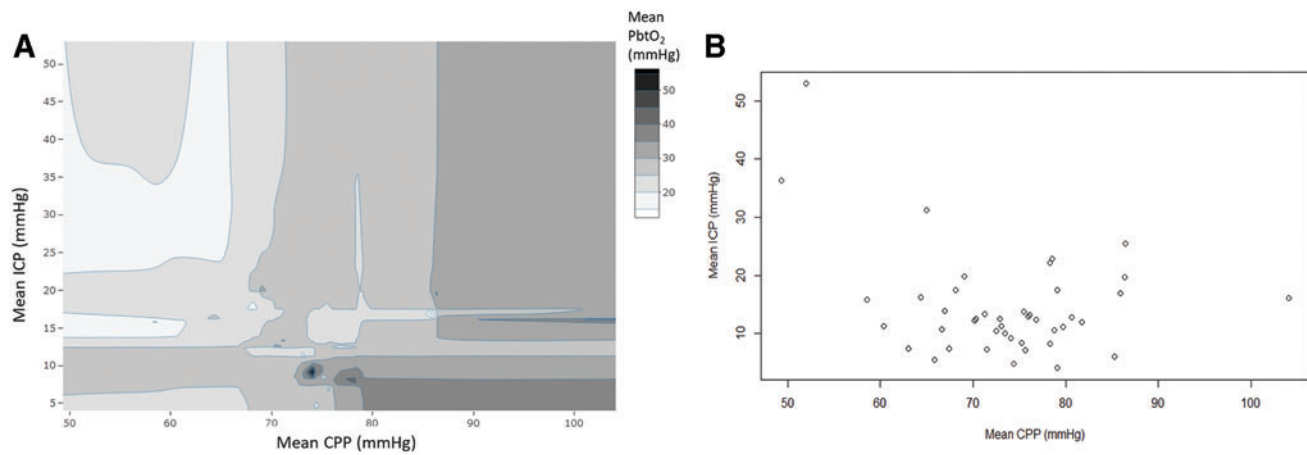

**SUPPLEMENTARY FIG. S1.** Contour plot intracranial pressure (ICP), cerebral perfusion pressure (CPP), and brain tissue oxygen (PbtO<sub>2</sub>): grand mean data. **(A)** Contour plot of mean ICP, CPP, and PbtO<sub>2</sub>, demonstrating increased PbtO<sub>2</sub> values with increasing CPP. **(B)** Data density plot for A.
