# Supplementary material
Source: PubMed Central journal article supplement (PMC7484893)
Supplement: Supp_TableS1-S2.pdf [file Supp_TableS1-S2.pdf]

SUPPLEMENTARY TABLE S1. ADMISSION PATIENT DEMOGRAPHICS: MEDIAN, IQR, AND RAW NUMBERS

|                                                          | <i>Median (IQR) or Raw Number</i> |
|----------------------------------------------------------|-----------------------------------|
| Number of patients                                       | 43                                |
| Age (years)                                              | 46 (31–65)                        |
| Sex                                                      |                                   |
| Male                                                     | 35                                |
| Female                                                   | 8                                 |
| Duration of high frequency physiological recording (h)   | 137.4 (89.2–174.5)                |
| Admission GCS (total)                                    | 6 (3–11)                          |
| Admission GCS Motor                                      | 3 (1–5)                           |
| Number with hypoxia episode                              | 8                                 |
| Number with Hypotension Episode                          | 3                                 |
| Admission pupil response                                 |                                   |
| Bilaterally reactive                                     | 32                                |
| Unilateral unreactive                                    | 4                                 |
| Bilaterally unreactive                                   | 7                                 |
| Marshall CT grade                                        | 3 (2–6)                           |
| Rotterdam CT grade                                       | 3 (3–5)                           |
| Number with traumatic SAH                                | 32                                |
| Number with epidural hematoma                            | 13                                |
| ICP (mm Hg)                                              | 12.5 (9.6–16.6)                   |
| % time with ICP >20 mm Hg                                | 5.8 (1.2–23.2)                    |
| PbtO <sub>2</sub> (mm Hg)                                | 26.8 (22.4–31.4)                  |
| % time with PbtO <sub>2</sub> < 20 mm Hg                 | 19.0 (3.9–34.6)                   |
| PRx (a.u.)                                               | 0.098 (-0.054–0.199)              |
| % time with PRx >0                                       | 60.9 (42.9–70.2)                  |
| % time with PRx > +0.25                                  | 34.6 (20.7–47.6)                  |
| % time with PRx > +0.35                                  | 23.8 (15.7–39.2)                  |
| <i>Abnormal PRx and abnormal PbtO<sub>2</sub></i>        |                                   |
| % time with PRx >0 and PbtO <sub>2</sub> < 20 mm Hg      | 7.2 (2.2–22.6)                    |
| % time with PRx > +0.25 and PbtO <sub>2</sub> < 20 mm Hg | 3.1 (0.9–14.2)                    |
| % time with PRx > +0.35 and PbtO <sub>2</sub> < 20 mm Hg | 2.4 (0.6–10.3)                    |
| <i>Abnormal PRx and normal PbtO<sub>2</sub></i>          |                                   |
| % time with PRx >0 and PbtO <sub>2</sub> > 20 mm Hg      | 36.2 (16.9–49.7)                  |
| % time with PRx > +0.25 and PbtO <sub>2</sub> > 20 mm Hg | 20.0 (6.2–28.3)                   |
| % time with PRx > +0.35 and PbtO <sub>2</sub> > 20 mm Hg | 12.1 (4.1–21.5)                   |
| <i>Normal PRx and abnormal PbtO<sub>2</sub></i>          |                                   |
| % time with PRx <0 and PbtO <sub>2</sub> < 20 mm Hg      | 3.0 (0.8–8.0)                     |
| % time with PRx < +0.25 and PbtO <sub>2</sub> < 20 mm Hg | 7.0 (2.4–15.4)                    |
| % time with PRx < +0.35 and PbtO <sub>2</sub> < 20 mm Hg | 9.8 (2.9–18.3)                    |
| <i>Global outcomes</i>                                   |                                   |
| 6 month GOSE                                             | 3 (1 – 5)                         |
| Total dead                                               | 9                                 |
| Total unfavorable outcome                                | 24                                |

Unfavorable outcome defined as GOSE of ≤4 at 6 months.

a.u., arbitrary units; CT, computed tomography; GCS, Glasgow Coma Score, GOSE, Glasgow Outcome Score Extended; ICP, intracranial pressure; IQR, interquartile range; MAP, mean arterial pressure; PbtO<sub>2</sub>, brain tissue oxygen, PRx, pressure reactivity index (correlation between slow-waves of ICP and MAP); SAH, subarachnoid haemorrhage.

SUPPLEMENTARY TABLE S2. UNIVARIATE LOGISTICAL REGRESSION A/D AND F/U OUTCOME FOR PHYSIOLOGICAL VARIABLES: SIGNIFICANT RESULTS ONLY

| <i>Variable</i>                                     | <i>A/D AUC (95% CI)</i> | <i>p value</i> | <i>F/U AUC (95% CI)</i> | <i>p value</i> |
|-----------------------------------------------------|-------------------------|----------------|-------------------------|----------------|
| % time with ICP >20 mm Hg                           | 0.648 (0.422-0.842)     | <b>0.006</b>   | 0.560 (0.391-0.732)     | 0.432          |
| % time with PRx >0                                  | 0.734 (0.570-0.868)     | <b>0.003</b>   | 0.661 (0.478-0.821)     | 0.063          |
| % time with PRx > +0.25                             | 0.747 (0.581-0.893)     | <b>0.002</b>   | 0.679 (0.500-0.830)     | <b>0.034</b>   |
| % time with PRx > +0.35                             | 0.745 (0.559-0.890)     | <b>0.002</b>   | 0.690 (0.522-0.837)     | <b>0.030</b>   |
| % time with PbtO <sub>2</sub> < 20 mm Hg            | 0.571 (0.337-0.798)     | 0.142          | 0.682 (0.516-0.829)     | <b>0.030</b>   |
| % time with PRx >0 and PbtO <sub>2</sub> < 20 mm Hg | 0.618 (0.387-0.820)     | 0.121          | 0.661 (0.497-0.819)     | <b>0.041</b>   |

Bolded *p* values are those reaching significance (i.e., *p* < 0.05).

A/D, alive/dead, AUC, area under the receiver operating curve; CI, confidence interval, F/U, favorable/unfavorable outcome (i.e., favorable, Glasgow Outcome Scale of 5–8; unfavourable, Glasgow Outcome Scale of 1–4); ICP, intra-cranial pressure; MAP, mean arterial blood pressure, PbtO<sub>2</sub>, brain tissue oxygen; PRx, pressure reactivity index (correlation between ICP and MAP).
